# Supplementary material
Source: Springer Nature journal article supplement (https://www.springermedizin.de/resource/supplementary/12904_2011_107_MOESM1_ESM.pdf/9517512)
Supplement: MOESM1 [file 9517512]

GP informs researcher about an eligible patient

Researcher sends information letter to patient and family caregiver

Informed consent and baseline measurement in the presence of the researcher

Control Group  
*Care as usual*

Intervention Group  
*Weekly teleconsultation*

ICT installation company installs telemedicine computer at the patient's home within 3-5 days

Weekly teleconsultations with the nurse practitioner of the palliative consultation team

***Randomization***
